# Excessive Biologic Response to IFN $\beta$ Is Associated with Poor Treatment Response in Patients with Multiple Sclerosis

Richard A. Rudick<sup>1\*</sup>, M. R. Sandhya Rani<sup>2</sup>, Yaomin Xu<sup>3</sup>, Jar-Chi Lee<sup>3</sup>, Jie Na<sup>3</sup>, Jennifer Shrock<sup>2</sup>, Anupama Josyula<sup>2</sup>, Elizabeth Fisher<sup>4</sup>, Richard M. Ransohoff<sup>1,2,9</sup>

**1** Mellen Center for Multiple Sclerosis, Neurological Institute, Cleveland Clinic, Cleveland, Ohio, United States of America, **2** Department of Neurosciences, Neuroinflammation Research Center, Lerner Research Institute, Cleveland Clinic, Cleveland, Ohio, United States of America, **3** Quantitative Health Sciences, Lerner Research Institute, Cleveland Clinic, Cleveland, Ohio, United States of America, **4** Department of Biomedical Engineering, Lerner Research Institute, Cleveland Clinic, Cleveland, Ohio, United States of America

## Abstract

**Background:** Interferon-beta (IFN $\beta$ ) is used to inhibit disease activity in multiple sclerosis (MS), but its mechanisms of action are incompletely understood, individual treatment response varies, and biological markers predicting response to treatment have yet to be identified.

**Methods:** The relationship between the molecular response to IFN $\beta$  and treatment response was determined in 85 patients using a longitudinal design in which treatment effect was categorized by brain magnetic resonance imaging as good (n = 70) or poor response (n = 15). Molecular response was quantified using a customized cDNA macroarray assay for 166 IFN-regulated genes (IRGs).

**Results:** The molecular response to IFN $\beta$  differed significantly between patients in the pattern and number of regulated genes. The molecular response was strikingly stable for individuals for as long as 24 months, however, suggesting an individual 'IFN response fingerprint'. Unexpectedly, patients with poor response showed an exaggerated molecular response. IRG induction ratios demonstrated an exaggerated molecular response at both the first and 6-month IFN $\beta$  injections.

**Conclusion:** MS patients exhibit individually unique but temporally stable biological responses to IFN $\beta$ . Poor treatment response is not explained by the duration of biological effects or the specific genes induced. Rather, individuals with poor treatment response have a generally exaggerated biological response to type 1 IFN injections. We hypothesize that the molecular response to type 1 IFN identifies a pathogenetically distinct subset of MS patients whose disease is driven in part by innate immunity. The findings suggest a strategy for biologically based, rational use of IFN $\beta$  for individual MS patients.

**Citation:** Rudick RA, Rani MRS, Xu Y, Lee J-C, Na J, et al. (2011) Excessive Biologic Response to IFN $\beta$  Is Associated with Poor Treatment Response in Patients with Multiple Sclerosis. PLoS ONE 6(5): e19262. doi:10.1371/journal.pone.0019262

**Editor:** Steven Jacobson, National Institutes of Health, United States of America

**Received:** December 30, 2010; **Accepted:** March 24, 2011; **Published:** May 13, 2011

**Copyright:** © 2011 Rudick et al. This is an open-access article distributed under the terms of the Creative Commons Attribution License, which permits unrestricted use, distribution, and reproduction in any medium, provided the original author and source are credited.

**Funding:** The study was funded by the National Institutes of Health (P50NS38667 and UL1 RR024989). The NIH had no role in study design, data collection and analysis, decision to publish, or preparation of the manuscript. Without charge, Biogen Idec tested serum from the study subjects for neutralizing antibodies at 6 months and provided the data to the investigators. Biogen Idec had no role in study design, data analysis, decision to publish, or preparation of the manuscript.

**Competing Interests:** The authors have read the journal's policy and wish to declare the following conflicts: All authors received support (paid to institution) for this project via NIH-NINDS grant P50 NS 38667 (2004–2009), Project 4 P01NS38667. [Rudick Richard] RMR was PI for the P50 and P01; RAR was director for Project 4. RAR: Consulting fees or honoraria: Biogen Idec, Novartis, Teva [Rudick, Richard], Millennium [Rudick, Richard], Genzyme-Bayer [Rudick, Richard], Wyeth, Bayhill [Rudick, Richard], Pfizer Royalties: Informa Healthcare Travel expenses paid: Novartis [Rudick, Richard], Millennium [Rudick, Richard], Genzyme-Bayer [Rudick, Richard], Merck Serono [Rudick, Richard], Wyeth [Rudick, Richard], Pfizer. RMR: Consultancies (within 12 mos): Abbott, Biogen, Johnson & Johnson, Merck, Novartis, Pfizer, Teva Paid lectures (not speakers bureaus): Biogen Idec, grand rounds only, not promotional Grants/grants pending (paid to institution): NIH; NMSS; Biogen Idec; Chemocentryx EF: Consultancies: Biogen Idec, Genzyme, Millennium, Pfizer, Wyeth Grants/grants pending (paid to institution): Biogen, Genzyme, Millennium, Wyeth; NIH-NINDS. Honoraria: Biogen, Teva Travel expenses: Biogen, Genzyme, Millennium, Wyeth, Pfizer. This does not alter the authors' adherence to all the PLoS ONE policies on sharing data and materials.

\* E-mail: rudickr@ccf.org

<sup>9</sup> These authors contributed equally to this work.

## Introduction

Interferon beta (IFN $\beta$ ) is routinely used to treat multiple sclerosis (MS), and in randomized placebo-controlled trials, reduced relapse rates by 30% [1–3]. However, clinical response varied among individuals, and *post-hoc* analyses of one study

revealed that about 20% of IFN $\beta$  recipients were poor responders (PR), defined as  $\geq 3$  new T2 hyperintense brain lesions occurring within 2 years of treatment onset [1,4]. Other studies by independent groups [5–7] consistently demonstrate that new brain MRI lesions develop in 20% to 25% of patients during IFN $\beta$  treatment and predict an unfavorable clinical outcome. Why some

patients respond poorly to IFN $\beta$  treatment, whereas others respond better is not understood, and there are no validated biomarkers that predict treatment response for individual patients.

IFN $\beta$  (a type I IFN) treatment is therapeutic in MS patients, as indicated by clinical trial patient group results. However, results from a clinical trial of interferon gamma (IFN $\gamma$ ) (a type II IFN) [8,9] demonstrated disease activation in some patients. Because type I and II IFNs regulate overlapping sets of IFN-regulated genes (IRGs), it is possible that some patients may worsen with IFN $\beta$  treatment. Such an outcome would not be evident from controlled clinical trials, where the majority of patients improve with treatment. Type I IFN is a cardinal mediator of innate immunity, whereas type II IFN participates in both innate and adaptive immunity. In the IFN $\gamma$  trial, MS disease activation was interpreted as implicating T<sub>H</sub>1-mediated processes in MS pathogenesis. Development of type I IFN therapy continued, however, leading to IFN $\beta$  approval.

Increased bioavailability of type I IFNs is involved in diverse autoimmune diseases [10], and increased expression of type I IRGs has been detected in a subset of untreated MS patients [11], suggesting that some patients have augmented innate immunity, which is detected by monitoring type I IFN IRG expression in the absence of IFN $\beta$  injections. Moreover, several neuropathology and immunology studies of IFN $\beta$  treatment suggest that MS immunopathogenesis may differ between patients [12,13]. Therefore, it is plausible that most MS patients improve with IFN $\beta$  therapy, while a minority worsen.

Poor clinical response to IFN $\beta$  can be related to production of IFN $\beta$ -neutralizing antibodies or to genetic variants in IFN $\beta$  receptors or signalling components [14]. In both categories, patients have reduced IFN $\beta$  bioavailability. However, such patients account for a minority of PRs [15]. In the remaining patients, poor response to IFN $\beta$  might relate to the nature of the IFN $\beta$  response, a relationship that could yield insight to the pathogenesis of MS, as well as strategies to personalize the use of IFN $\beta$ . Microarray-based cross-sectional expression analyses and studies of individual candidate genes support this concept [16,17]. Here, we addressed the general hypothesis that the molecular response to IFN $\beta$  correlates with treatment response in individual patients with MS, and thus might provide biological markers useful to estimate prognosis, guide therapy, or offer insights into pathogenesis.

## Methods

### Clinical Protocol

The Cleveland Clinic Institutional Review Board approved the study. After discussion with our bioinformatics colleagues, but without a formal power calculation, we sought to enroll 100 patients. All subjects provided written informed consent. Subjects were eligible if they had clinically isolated syndrome (CIS) or relapsing-remitting MS, were treatment-naïve, were initiating intramuscular IFN $\beta$ -1a treatment, and were followed at the Mellen Center (our MS center). Each patient was examined at baseline, 6, 12, and 24 months. At 3 and 18 months, patients were contacted by phone to assess treatment compliance and ascertain side effects. At baseline, 6, and 24 months, blood was collected for IRG analysis in a clinical research unit immediately before and exactly 12 hours after an IFN $\beta$  injection, and the patients had standardized brain MRI scans for quantitative assessment of lesions and brain atrophy. At each visit, patients had neurological exams to determine the Kurtzke Expanded Disability Scale Score [18], the Multiple Sclerosis Functional Composite score [19], and history of intercurrent relapses or illness; they also were given a

structured questionnaire to characterize flu-like symptoms, muscle aches, chills, fatigue, headache, and loss of strength. Serum was tested for IFN-neutralizing antibodies at 6 and 24 months. This report focuses on the 85 subjects with complete data at baseline and 6 months.

### MRI Analysis

The MRI acquisition included T2-weighted fluid-attenuated inversion recovery (FLAIR), T2- and proton density-weighted dual echo fast spin echo, and T1-weighted spin echo images acquired before and after injection of a standard dose of gadolinium (0.1 mmol/kg). Images were analyzed using software developed in-house to determine brain parenchymal fraction (BPF), T2 lesion volume, gadolinium-enhancing lesion volume and number, and the numbers of new and enlarging T2 lesions. BPF was calculated from FLAIR images using fully automated segmentation software [20]. Details of the lesion analysis methodology have been previously described [21]. Briefly, T2 hyperintense lesions were automatically segmented in the FLAIR and T2/PD images and visually verified using interactive software to correct misclassifications. Six-month follow-up images were registered to baseline, and intensity was normalized. Baseline T2 lesion masks were applied to the registered 6-month images to identify persistent lesions. The baseline images were then subtracted from the registered, intensity-normalized 6-month images to automatically identify new and enlarging T2 lesions at 6 months. For detecting enlarging lesions, the registration and subtraction software has cut-offs based on scan-rescan reproducibility of individual lesion volumes. For lesions  $\geq 150 \text{ mm}^3$ , the lesion must grow by 20% to be counted as enlarging. For lesions  $<150 \text{ mm}^3$ , the lesion must grow by 50% to be counted as enlarging. New and enlarging T2 lesions were visually verified using interactive software to generate the final counts.

### RNA isolation

RNA was extracted *ex-vivo* from blood using the PAXgene RNA blood extraction kit (PreAnalytix, Switzerland) per the manufacturer's instructions and concentrated by ethanol precipitation. RNA quality and quantity were assessed by spectrophotometry (absorbance ratios, 260/280 nm) and visualized by agarose gel electrophoresis. Samples were stored at  $-80^\circ\text{C}$ .

### Genes analyzed by macroarray

The cDNA macroarray analysis was performed as previously described [22,23]. IRGs on a custom macroarray were represented by 166 human cDNAs selected from the Unigene database. Table S1 lists all genes on the macroarray with their GenBank accession numbers. These type I IFN IRGs were identified by microarray analysis of fibrosarcoma, epithelial, or endothelial cell lines treated with IFN- $\alpha$  or IFN $\beta$  [22,23]. All were known IRGs.

The protocol for spotting DNA on the membrane, probe labeling, and hybridization has been described previously, with modifications as follows [22,23]. Total RNA, 5  $\mu\text{g}$ , isolated *ex-vivo* from blood was used for generating radiolabeled cDNA probes by reverse transcription with Superscript II in the presence of  $^{32}\text{P}$ -dCTP (Invitrogen, Carlsbad, CA). Residual RNA was hydrolyzed by alkaline treatment at  $70^\circ\text{C}$  for 20 min after which cDNA was purified using G50 columns (GE Healthcare, Buckinghamshire, UK). Preparation of macroarrays and hybridization of radioactive cDNA were conducted as described previously [22,23]. Induction ratios (IRs) were calculated from radioactivity bound to the membranes.

To minimize variability, each patient's samples at baseline and 6 months were processed in a single batch experiment. A detailed

laboratory protocol for the macroarray method is available on request.

IRs were validated using real-time (rt) quantitative PCR for 5 genes: OASL (accession number NM003733); TRAIL (U37518); IFI44 (D28915); HLADRA (J00194); and TIMP-1 (M59906). Spearman correlation coefficients between IRs calculated from rt-PCR and macroarray data for OASL, TRAIL, IFI44, HLADRA, and TIMP-1 were 0.92, 0.75, 0.36, 0.72, and 0.54, respectively, all statistically significant.

**Statistical analysis**

Poor response to IFN $\beta$  was based on quantitative MRI analysis, comparing the MRI at the 6-month visit with baseline. Poor response was defined as the occurrence of  $\geq 3$  new or enlarging lesions. Differences in baseline characteristics between good responder (GR) and PR groups were compared using t-tests or Fisher’s exact tests, as appropriate. A Poisson regression was used to test group differences in the number of induced IRGs with IRs $\geq 2.0$  at the baseline injection. Pearson correlation coefficients of log<sub>2</sub> transformed IRs at initial injection compared with 6 months were computed for all 85 patients. Baseline, 6-month, and 24-month pair-wise correlations were computed for 5 randomly selected patients from each group.

To minimize noise, a filter was applied to exclude IRGs that were not regulated in this study. Genes with mean IRs within the range of 0.9 to 1.1 (i.e., +/- 10% from an IR of 1.0, or no change) were excluded. Using this method, 48 of the 166 IRGs were eliminated from further analysis at the initial IFN $\beta$  injection, and 30 IRGs were eliminated at the 6-month injection. For the remaining IRGs, covariate-adjusted least-square means (LS means) of the log<sub>2</sub>-transformed IRs were computed and compared between response groups by ANCOVA. The covariates were baseline age, sex, presence of gadolinium-enhancing lesions, and T2 volume.

The remaining IRGs were classified as upregulated or downregulated as follows: an IRG was upregulated if more than 50% of the 85 subjects had an IR $>1.0$ ; an IRG was classified as downregulated if more than 50% had an IR $<1.0$ . For each IRG, LS means of the IRs were compared between PRs and GRs. The response was classified as exaggerated at the group level if

PRs $>$ GRs in upregulated genes, or PRs $<$ GRs in downregulated genes. The proportion of genes showing an exaggerated response in PRs was tested (one-sided) with a binomial proportion test assuming a null hypothesis of proportion $\leq 0.5$ .

To further investigate whether IRGs could discriminate between the responder groups, the magnitude of the exaggeration in each patient was computed as a sum of the exaggerated amounts (absolute differences between individual IRs and IR medians) for each regulated IRG. That is, for upregulated genes, if the individual IR was greater than the median for the whole group, or for downregulated genes, if the individual IR was less than the median for the whole group, then the exaggerated amount was calculated. The magnitudes of exaggerated responses were compared in PRs and GRs at the first and 6-month injections using ANCOVA with baseline demographic features, presence of baseline gadolinium lesions, and baseline T2 lesion volume as covariates.

**Results**

**Research Subjects**

Of the 99 subjects enrolled, 85 continued to take intramuscular IFN $\beta$ -1a for at least 6 months, which was the predetermined time-point for determining treatment response based on MRI, for correlation with IRG macroarray results. Reasons for drop out included: side effects (n=4); new health issues (n=2); no explanation provided (n=4); left area (n=1); switched to glatiramer acetate per patient preference (n=1); sample hybridization not adequate at baseline or 6 month injection (n=2). Subjects were encouraged to remain in the protocol for 24 months, so that the relationship between 6-month MRI activity and later disease progression, as well as stability of the IFN $\beta$  molecular response, could also be determined. At the time of this report, subject accrual was complete, and all subjects had 6-month visits. This report focuses on the analysis of 85 patients with complete data at baseline and 6 months. Of the 14 patients who were enrolled in the study but did not complete the planned 6-month macroarray analysis, 12 discontinued IFN $\beta$ -1a, whereas sample hybridization was unsuccessful in the other 2, either at first injection or 6 months. Ten patients who had completed the 24-

**Table 1.** Comparison of baseline characteristics between patients with a good vs poor response to IFN $\beta$  treatment.\*

| Characteristic                                 | Good Responders (n = 70) | Poor Responders (n = 15) | All Patients (n = 85) | P-value GR vs PR |
|------------------------------------------------|--------------------------|--------------------------|-----------------------|------------------|
| Age (years)                                    | 36.3 (9.4)               | 33.0 (11.2)              | 35.7 (9.8)            | 0.30             |
| Symptom duration (years)                       | 2.5 (3.0)                | 1.2 (1.7)                | 2.4 (2.9)             | 0.39             |
| Female (%)                                     | 69                       | 47                       | 65                    | 0.11             |
| White (%)                                      | 93                       | 80                       | 91                    | 0.14             |
| CIS /RRMS (%/%)                                | 34 / 66                  | 20 / 80                  | 32 / 68               | 0.37             |
| EDSS                                           | 1.6 (1.0)                | 1.6 (1.2)                | 1.6 (1.0)             | 0.91             |
| MSFC score                                     | 0.39 (0.48)              | 0.19 (0.41)              | 0.35 (0.47)           | 0.10             |
| Patients (%) with gad-enhancing lesions        | 24.3                     | 53.3                     | 29.4                  | 0.03             |
| Gad-enhancing lesion volume (mm <sup>3</sup> ) | 0.097(0.38)              | 0.44 (0.72)              | 0.16 (0.47)           | 0.09             |
| T2 Volume                                      | 3.0 (3.7)                | 5.8 (3.9)                | 3.5 (3.8)             | 0.02             |
| T1 BH Volume                                   | 0.55 (0.75)              | 0.87 (0.82)              | 0.61 (0.77)           | 0.19             |
| BPF                                            | 0.858 (0.014)            | 0.859 (0.013)            | 0.859 (0.014)         | 0.79             |

\*All values are mean $\pm$ SD, unless otherwise indicated.

CIS = clinically isolated syndrome; RRMS = relapsing-remitting multiple sclerosis; EDSS = Expanded Disability Scale Score; MSFC = Multiple Sclerosis Functional Composite; Gad = gadolinium; BH = black hole; BPF = brain parenchymal fraction.

doi:10.1371/journal.pone.0019262.t001

month protocol contributed blood for 24-month IRG analysis. Baseline demographic and disease characteristics did not significantly differ between those who completed the first 6 months and those who did not (data not shown). For all other analyses, only the 85 patients who completed the first 6 months were included. Among these 85, 32% had CIS with multiple brain MRI lesions, and 68% had relapsing-remitting MS. The mean age was 35.7 years; mean disease duration was 2.4 years; 65% were women; and 91% were white. At 6 months, 15 (18%) subjects were classified as PRs based on our pre-determined MRI definition. The two groups were similar at baseline on all characteristics except that a higher proportion of PRs had gadolinium-enhancing lesions and greater T2 lesion volumes at baseline, indicating PRs had more severe disease (Table 1).

### IRG Response to First Injection and Stability over Time

Preliminary assays in healthy subjects not receiving IFN $\beta$  showed that IRs did not vary more than 1.5-fold in assays separated by 12 or 24 hours. Therefore, an IR $\geq$ 2.0 defined induction of an IRG. The number of induced IRGs at the first IFN $\beta$  injection varied among patients, ranging from 7 to 135, with no relationship between IFN $\beta$  responder status and number of induced genes ( $p = 0.76$ ) (data not shown). Similarly, the pattern of

response to the initial IFN $\beta$  injection varied considerably between patients as previously reported<sup>22</sup>.

Figure 1 shows the IRs at first injection plotted against IRs at 6 months for a representative patient with a good response (Fig 1A), a representative patient with a poor response (Fig 1B), for all 70 patients with a good response (Fig 1C) and for all 15 patients with a poor response (Fig 1D). Despite inter-individual variability in the pattern and magnitude of IRG response after the first IFN $\beta$ -1a injection, the response was remarkably stable over time for individual subjects. Figure S1 shows the IRs at baseline and 6 months for each of the 85 patients. Two subjects (patients 7 and 25) had viral infections at the initial injection and so had little or no IRG induction at the first injection due to high pre-injection IRG expression levels. Both subjects responded to IFN $\beta$  injection at 6 months. Patient 21 developed neutralizing antibodies to IFN $\beta$  detected at 6 months. This subject responded briskly to the first IFN $\beta$  injection, but minimally at 6 months. Neutralizing antibody testing of all other subjects was negative at 6 months.

Excluding those three subjects, IRs at first injection strongly correlated with IRs at 6 months for individual patients [Pearson correlation coefficient mean ( $\pm$ SD) = 0.81 $\pm$ 0.11]. The mean correlation coefficient for the 15 PRs (study numbers 1, 4, 12, 14, 18, 40, 49, 57, 62, 65, 66, 70, 87, 91, and 92) was 0.81 $\pm$ 0.10,

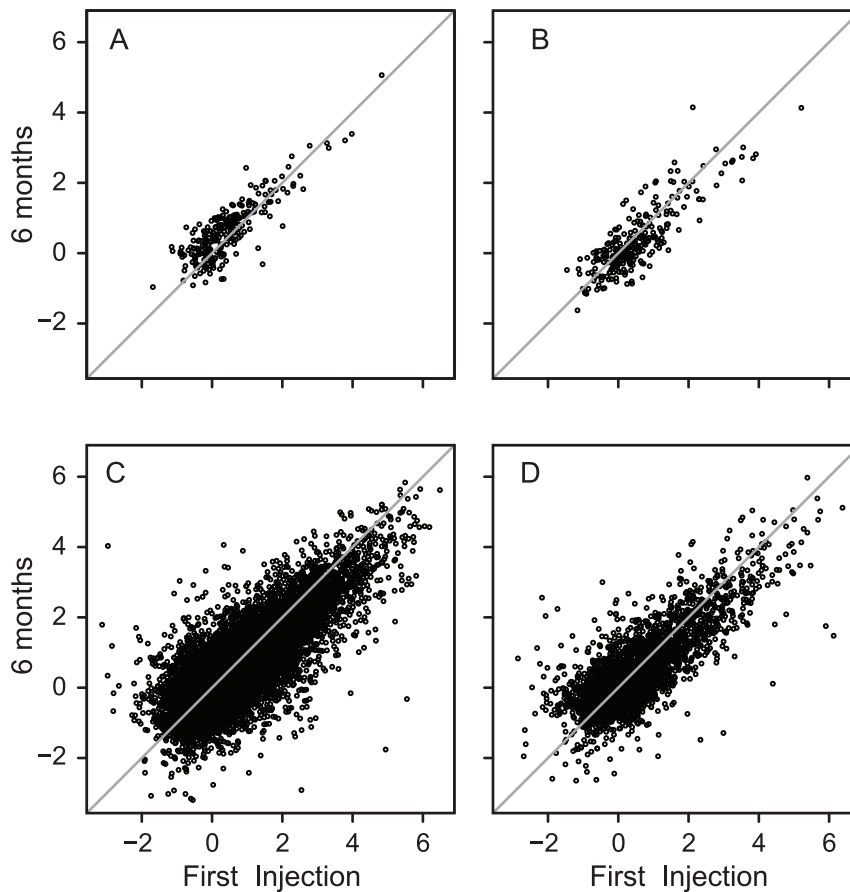

**Figure 1. Correlations between induction ratios (IRs) for two patients at the initial (baseline) and 6-month injections.** A) Patient 2 had a good treatment response; B) Patient 1 had a poor treatment response; C) All genes in all patients with a good treatment response; and D) All genes in all patients with a poor treatment response. Identical IRs at the two time points fall on the diagonal whereas deviation from the diagonal reflects changes in the IRs at the first injection compared with the 6-month injection. Note the highly conserved IRG response at the two time points, both at the initial injection and 6 months later. There were no differences in consistency of the response in the good vs poor responders. Supplemental Figure 1 shows correlations for each of the 85 patients, including patients 1 and 2. doi:10.1371/journal.pone.0019262.g001

compared with a mean of  $0.81 \pm 0.11$  for the 67 GR patients (excluding subjects 7, 21, and 25, Figure S1).

The IRG analysis was repeated at 24 months for 10 selected patients (5 PRs and 5 GRs) (Figure 2). The IRG response was consistent over 2 years, with no appreciable difference between GRs and PRs. The IRs strongly correlated between baseline and 6 months ( $r = 0.80$  for GRs,  $r = 0.91$  for PRs); between 6 months and 24 months ( $r = 0.81$  for GRs,  $r = 0.83$  for PRs); and between baseline and 24 months ( $r = 0.83$  for GRs,  $r = 0.87$  for PRs). Figure

S2 shows scatter plots for each patient, demonstrating highly consistent molecular responses to IFN $\beta$  injections over 24 months, regardless of responder status. These results suggested that treatment response status could not be attributed to attenuation of the molecular response to IFN $\beta$  over time.

#### IRG Response in Good vs Poor IFN $\beta$ Responders

The biological effects of IFN $\beta$  are traditionally accounted for by the activities of the IRG protein products [24]. We addressed

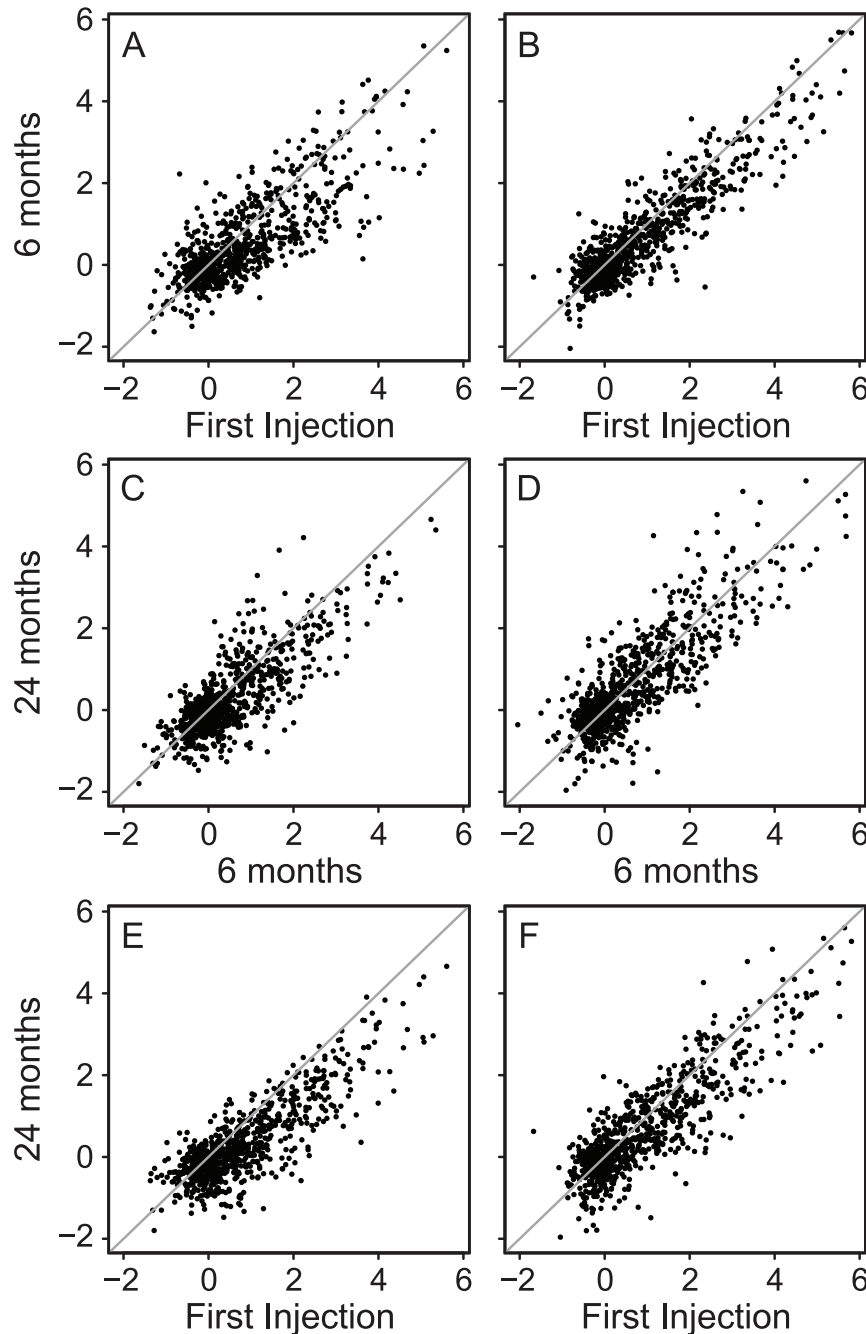

**Figure 2. Scatter plots showing correlations between induction ratios between 3 time points over 24 months.** Panels (A), (C) and (E): 5 good responders showing the correlation between the initial injection and the 6-month injection (A); between the 6-month and 24-month injection (C); and between the initial and the 24-month injection (E). Panels (B), (D), (F): 5 poor responders at the same time points. Note the highly conserved IRG response over 24 months, both in the good and poor responders. doi:10.1371/journal.pone.0019262.g002

whether the characteristics of the molecular response to IFN $\beta$  might explain PR status, either by revealing induction of deleterious inflammatory gene products [17] or selective failure of expression of beneficial genes [25]. In univariate analyses of the genes remaining after filtering, the covariate-adjusted LS mean IRs indicated differential responses ( $p \leq 0.05$ ) between the PR and GR groups for 13 genes at the initial IFN $\beta$  injection, and 16 genes at the 6-month injection (Table 2). Unexpectedly, for all 13 genes at the initial injection, and for all 16 genes at the 6-month injection, the response, either induction or repression, was greater for patients with a poor response. This suggested an exaggerated IFN $\beta$  molecular response in the patients with a poor clinical response to IFN $\beta$  treatment. Figure 3 shows that 97 (82%) of 118 genes with mean IRs outside the 0.9–1.1 range showed an exaggerated response to IFN $\beta$  at the first injection, and 100 (74%) of 136 genes with mean IRs outside the 0.9–1.1 range showed an

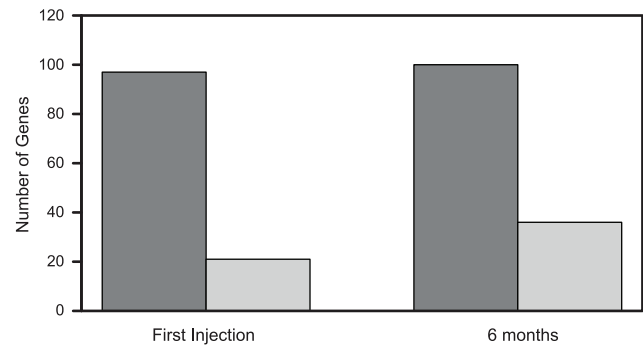

**Figure 3. Number of genes with an exaggerated response in poor responders at the initial (A) and 6-month injection (B).** The dark gray bars represent genes with an exaggerated response, and the light gray bars represent genes with no exaggerated response, as defined in the Methods section. The proportion of genes with an exaggerated response in PRs was significantly higher than 50% at first injection ( $p < 0.001$ ) and 6 months ( $p < 0.001$ ). doi:10.1371/journal.pone.0019262.g003

**Table 2. Univariate analysis with adjustment for covariates comparing induction ratios between good and poor responders to IFN $\beta$ .**

| Time of IFN $\beta$ Injection | Gene      | Mean Adjusted IR |               | P Value |
|-------------------------------|-----------|------------------|---------------|---------|
|                               |           | Good Response    | Poor Response |         |
| Month 0<br>(n = 85)           | IL2       | 0.89             | 0.47          | 0.001   |
|                               | ISG15-L   | 2.01             | 3.07          | 0.004   |
|                               | TIMP-1    | 0.96             | 0.65          | 0.005   |
|                               | IDO       | 3.18             | 5.17          | 0.008   |
|                               | CD3e      | 0.73             | 0.54          | 0.012   |
|                               | IFIT5     | 1.91             | 2.51          | 0.013   |
|                               | FK506     | 1.29             | 1.65          | 0.013   |
|                               | P4Ha1     | 1.14             | 1.41          | 0.020   |
|                               | PI3K      | 1.50             | 1.99          | 0.026   |
|                               | OASL      | 3.41             | 4.63          | 0.030   |
|                               | HLADP     | 0.91             | 0.72          | 0.039   |
|                               | TRAIL     | 4.50             | 6.23          | 0.048   |
|                               | MT1X      | 2.95             | 4.53          | 0.049   |
| Month 6<br>(n = 84)*          | IFIT5     | 1.53             | 2.25          | 0.001   |
|                               | Elastase2 | 1.16             | 1.45          | 0.003   |
|                               | CCR5      | 1.09             | 1.40          | 0.004   |
|                               | UBE2L6    | 1.56             | 2.09          | 0.011   |
|                               | Hou       | 1.54             | 2.35          | 0.016   |
|                               | TRAIL     | 3.51             | 4.93          | 0.028   |
|                               | TNFAIP6   | 2.17             | 3.05          | 0.029   |
|                               | IL 15     | 1.28             | 1.64          | 0.030   |
|                               | TOR1B     | 1.96             | 2.57          | 0.033   |
|                               | IP-10     | 1.20             | 1.49          | 0.039   |
|                               | Caspase 1 | 1.36             | 1.80          | 0.039   |
|                               | FLJ20035  | 1.67             | 2.19          | 0.040   |
|                               | PLSCR1    | 1.22             | 1.46          | 0.040   |
|                               | IFN-44    | 2.00             | 2.68          | 0.043   |
|                               | CEACAM    | 1.52             | 1.96          | 0.045   |
|                               | RIG-1     | 3.27             | 4.60          | 0.045   |

IR = Induction ratio.  
\*1 patient with NAB with no biological response at 6 months was excluded.  
doi:10.1371/journal.pone.0019262.t002

exaggerated response at the 6-month injection. The proportion of genes with an exaggerated response in PRs was significantly higher than 50% ( $p < 0.001$  at first injection and 6 months). Figure 4 shows the magnitude of the difference between the biological response for GRs and PRs at the first injection (figure 4A) and at 6 months (Figure 4B). the magnitude of exaggeration was significantly higher in PRs at the first injection ( $p = 0.007$  and 6-month injection ( $p = 0.02$ ).

### Discussion

Although IFN $\beta$  is the most commonly used disease-modifying treatment for MS, its mechanisms of action are not fully understood, no biological markers are available to guide individualized therapy, and differential clinical responsiveness is not understood at a mechanistic level. We sought to determine molecular correlates of the treatment response to IFN $\beta$  therapy in relapsing-remitting MS. Response to IFN $\beta$  was defined in advance, using MRI to classify treatment response in individual patients. In that regard, numerous reports have documented that patients developing new lesions while on IFN $\beta$  have relatively poor clinical outcomes. [4–7] Neutralizing antibodies were not observed at 6 months in any of the 15 patients classified as poor responders, and so could not have explained the poor response to therapy. We believe these 15 patients will have a poor clinical outcome compared with the patients classified as a good treatment response, but that differences will become evident only with longer follow-up. We continue to follow these patients, and will report outcomes in a future publication after all patients have been followed at least 2 years.

We initially hypothesized that 1) the molecular response to IFN $\beta$  would differ between patients but would be stable over time within individuals, and 2) treatment response would correlate with the nature of the primary molecular response or its persistence over time. We confirmed that the molecular response differs significantly between patients in regard to the identity and number of regulated IRGs and the extent of induction or repression.[22] Our study documents that the IRG response was remarkably consistent in individual MS patients for as long as 24 months, suggesting an individual IRG ‘fingerprint’. Exceptions to this finding (patients 7, 21, 25) were uncommon and readily explained. The molecular response remained consistent over time regardless of MRI outcome, excluding the possibility that attenuated IRG

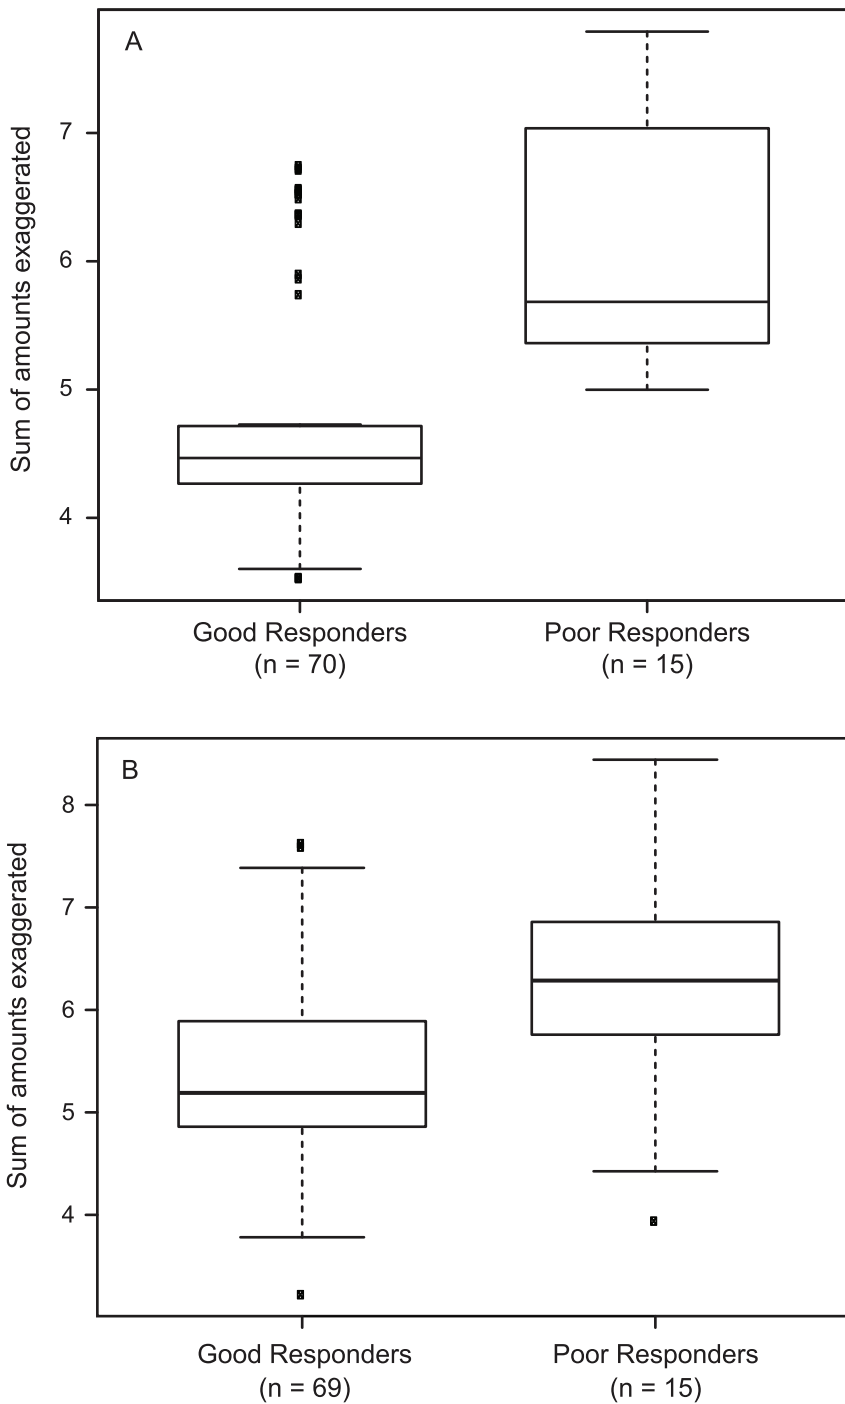

**Figure 4. The magnitude of the exaggerated response for good and poor responder groups at the initial (A) and the 6-month (B) injection.** The magnitude of exaggeration was significantly higher in PRs at the first ( $p=0.007$ ) and 6-month injections ( $p=0.02$ ). doi:10.1371/journal.pone.0019262.g004

regulation explained the variable response to IFN $\beta$ . The groups differed, however, in the magnitude of IRG induction and repression, both of which, surprisingly, were exaggerated in PRs.

This study differs methodologically from prior studies of IRG expression in MS. First, we used a prospective design and a defined, validated outcome measure based on an objective MRI criterion [4] that clearly delineates patients with poor clinical outcomes on IFN $\beta$  treatment [7]. Second, we quantified IRG expression with a customized cDNA macroarray assay containing

166 IRGs, selected on the basis of previous microarray experiments. This macroarray has been validated for other disease indications such as IFN- $\alpha$  treatment for hepatitis C virus, and is reproducible, sensitive, and quantitative [23]. For focused quantitative studies of a relatively small number of regulated genes such as the IRGs, the macroarray was well-suited to our research questions. Importantly, phlebotomy was performed in a clinical research unit precisely 12 hours after IFN injection, minimizing variability induced by differences in sampling times.

Finally, we used a single IFN $\beta$  preparation, likely reducing noise in the molecular response measure. The findings can be extrapolated to IFN $\beta$  treatment generally because the molecular response to the three approved IFN $\beta$  preparations is highly consistent [26–30].

The consistent pattern of exaggerated induction or repression of IRGs in patients who responded poorly was observed at the initial IFN $\beta$  injection and confirmed at 6 months, indicating that this exaggerated response was a stable phenotype. Over time, circulating leukocyte subsets change with IFN $\beta$  therapy, so it was not surprising that the specific genes identified as distinguishing good and poor responders differed at the two time points. This observation leads to a novel hypothesis: patients with MS who exhibit an exaggerated response to exogenous IFN $\beta$  have both a poor treatment response and more severe disease. Indeed, patients categorized as poor responders were more likely to have gadolinium enhancing lesions at baseline, and had a higher T2 lesion burden. Thus, patients with poor response to IFN $\beta$  injections already had more active disease at treatment start. We believe the explanation for this observation is that the response to exogenous IFN $\beta$  injections reflects responses to endogenous type 1 IFN. It has been well recognized that some, but not all, MS patients experience relapses during viral infection, which strongly induces endogenous type 1 IFN. An exaggerated response to type 1 IFN plus disease driven by aberrant innate immunity might explain the response to viral infection in a subset of MS patients. Our hypothesis would predict that patients experiencing disease activation with viral infections would have more severe disease. This has not been studied.

Our study has several limitations. First, there was no placebo-treated, or untreated comparison group, so the subset we've identified could simply represent more severe disease, and the outcome might have nothing to do with IFN $\beta$  treatment. Second, advances in microarray technology during the course of this longitudinal study now permit more quantitative assessment of the RNA we collected. Those experiments, currently ongoing, have the potential to confirm or refute the current findings, and possibly to extend them considerably. Third, the classification of poor treatment response was based entirely on a prospectively defined MRI outcome. The clinical outcome for poor and good response subgroups needs to be established in long-term follow-up studies, which are ongoing. Lastly, our findings must be confirmed in separate patient cohorts and by independent investigators.

Our hypothesis is consistent with a recent report by Axtell and colleagues suggesting that fundamentally different pathogenic pathways in MS subjects underlie the differential response to IFN $\beta$  therapy [12]. They reported that IFN $\beta$  was effective in suppressing murine experimental allergic encephalomyelitis caused by transfer of T<sub>H</sub>1 cells, but exacerbated disease caused by transfer of T<sub>H</sub>17 cells. Intriguingly, two IRGs we found to be markedly regulated by IFN $\beta$  (IL2, PI3K) would be predicted to act in a manner consistent with the hypothesis proposed by Axtell et al. Specifically, we observed exaggerated inhibition of IL2 and exaggerated induction of PI3K, which together could cause T<sub>H</sub>17-mediated inflammation that would be resistant to inhibition by gene products of the type 1 IFN response, including IL10 [31,32]. van Baarsen et al. [33] found that high expression of 15 IRGs before starting IFN $\beta$  treatment predicted limited induction of IRGs after treatment. They concluded that the ability to respond to IFN $\beta$  pharmacologically was intrinsic to circulating blood cells, before the introduction of IFN $\beta$ . Our results are in part consistent with Comabella et al., [34] who found overexpression of IFN-induced genes prior to IFN $\beta$  treatment in patients with a poor clinical response. Our findings also generally agree with recent genome-wide association studies showing that MS susceptibility was

associated with a SNP near the IRF8 gene [35] and another SNP within the gene encoding TYK2 [36], a cytoplasmic tyrosine kinase required for IFN responses. The IRF8 susceptibility SNP was associated with increased expression of a wide variety of IFN pathway genes, and the TYK2 SNP encoded a variant amino acid in the kinase domain that was predicted to modify IFN-driven gene expression. These observations suggest that the type 1 IFN pathway, a critical component of the innate immune system, may play a pathogenic role in some patients with MS. Finally, our results are reminiscent of findings related to the IFN-treatment response in patients with chronic hepatitis C infection [37]. Patients with a poor treatment response to pegylated IFN $\alpha$  and ribavirin had high levels of IRG products in pre-treatment liver biopsies compared to patients with a good response, suggesting that activation of the endogenous IFN system was not only ineffective in clearing hepatitis C virus, but was also predictive of a poor response to exogenous IFN therapy.

Despite these recent reports, predictive biomarkers for IFN $\beta$  treatment failure have not been identified or validated [6,14,16,38–48]. Our observations introduce the novel concept that the differential treatment response to IFN $\beta$  is not explained by a specific set of IRGs, but rather by a generally augmented IRG response to IFN $\beta$  injections, and that response to IFN $\beta$  injection unmasks a subset of patients who not only respond poorly to IFN $\beta$  treatment, but who have a pathogenetically distinct form of MS. This hypothesis has at least two major implications. First, because the response to an initial IFN $\beta$  injection strongly correlated to response to therapy 6 months later it should be possible to develop assays that identify patients who will have a poor response to IFN $\beta$  therapy, enabling the tailoring of disease-modifying therapy for individual patients. It may be possible to develop an assay that could be applied to decide whether a patient is likely to do poorly on IFN $\beta$  therapy. Because MS lesions can irreversibly injure axons [49], optimizing therapy quickly might substantially benefit patients. Development and validation of a biomarker based on these observations, is beyond the scope of this initial report, however.

A more wide-ranging implication relates to MS pathogenesis. Mechanistic proposals for disease pathogenesis have focused on adaptive immunity, particularly immune responses directed against myelin constituents. We found that IFN $\beta$  recipients who became PRs already had higher levels of disease activity and disease burden, as measured by MRI, upon entering the study. We hypothesize that these patients exhibit a pathogenic pathway *that is characterized in part by their response to endogenous type 1 interferon*. A corollary is that differences in innate immunity, either within type 1 IFN pathways or affecting the expression levels of IRGs indirectly, are determinant for enhanced disease severity in PRs.

In that regard, IFN $\beta$  injection can be viewed as a provocative test that may expose a genetically or epigenetically determined type 1 IFN response that contributes to pathogenesis. In these individuals, exogenous IFN $\beta$  elicits an exaggerated response, either by upregulation from a lower pre-injection IRG expression level<sup>32</sup> or through augmented responses from an equivalent pre-injection baseline. In either case, the findings in this study implicate innate immunity in MS pathogenesis from its onset and may provide novel insights into the fundamental disease process, along with new therapeutic targets and hope for personalized use of IFN $\beta$ .

## Supporting Information

**Figure S1A Scatter plots showing the IFN $\beta$  molecular response at baseline and 6 months for 57 of 85 patients.**



The study subject number is indicated above each plot; response at baseline is shown on the x-axis and at 6 months is shown on the y-axis. For each subject, the induction ratio for each of 166 genes is shown at the two time points. The variability of the molecular response between the two time points is indicated by deviation from the diagonal line in each plot. A consistent response at the two time points is evident except for patients 7, 21, and 25 (see text). Also, response consistency was similar between patients with poor treatment response (circled study subject numbers). (EPS)

**Figure S1B Scatter plots showing the IFN $\beta$  molecular response at baseline and 6 months for the remaining 37 of the 85 patients.** The study subject number is indicated above each plot; response at baseline is shown on the x-axis and at 6 months is shown on the y-axis. For each subject, the induction ratio for each of 166 genes is shown at the two time points. The variability of the molecular response between the two time points is indicated by deviation from the diagonal line in each plot. Response consistency was similar between patients with poor treatment response (circled study subject numbers). (EPS)

**Figure S2 Scatter plots for 10 individual patients showing a consistent response over 24 months.** Five good and 5 poor responders were randomly selected from each group with macroarray data at baseline, 6 months, and 24 months. The

first 3 columns show patients with a good treatment response, and the last 3 columns are patients with a poor treatment response. Columns 1 and 4 compare responses at baseline and 6 months; columns 2 and 5 compare responses at 6 and 24 months; and columns 3 and 6 compare responses at baseline and 24 months. Note the consistency of response for all time points and that the molecular response is consistent regardless of whether treatment response is good or poor.

(EPS)

**Table S1**  
(DOC)

## Acknowledgments

We thank Dr. Joerg Schlaak (University of Essen, Germany) and his colleagues for extensive and thoughtful assistance during the development of the macroarray assay. We also thank Cassandra Talerico, PhD, (a salaried employee of the Cleveland Clinic) for editorial review.

## Author Contributions

Conceived and designed the experiments: RAR RMR EF. Performed the experiments: MRSR JS AJ. Analyzed the data: RAR RMR EF YX J-CL JN. Wrote the paper: RAR RMR EF. Developed the macroarray assay and supervised the macroarray analyses: MRSR. Conceived and implemented data analysis plans, supervised data analyses and database implementation: YX. Provided database programming: JN.

## References

- Jacobs LD, Cookfair DL, Rudick RA, Herndon RM, Richert JR, et al. (1996) Intramuscular interferon beta-1a for disease progression in relapsing multiple sclerosis. the multiple sclerosis collaborative research group (MSCRG). *Ann Neurol* 39: 285–294.
- PRISMS (prevention of relapses and disability by interferon beta-1a subcutaneously in multiple sclerosis) study group (1998) Randomised double-blind placebo-controlled study of interferon beta-1a in relapsing/remitting multiple sclerosis. *Lancet* 352: 1498–1504.
- The IFNB multiple sclerosis study group (1993) Interferon beta-1b is effective in relapsing-remitting multiple sclerosis. I. clinical results of a multicenter, randomized, double-blind, placebo-controlled trial. *Neurology* 43: 655–661.
- Rudick RA, Lee JC, Simon J, Ransohoff RM, Fisher E (2004) Defining interferon beta response status in multiple sclerosis patients. *Ann Neurol* 56: 548–555.
- Rio J, Rovira A, Tintore M, Huerga E, Nos C, et al. (2008) Relationship between MRI lesion activity and response to IFN-beta in relapsing-remitting multiple sclerosis patients. *Mult Scler* 14: 479–484.
- Durelli L, Barbero P, Bergui M, Versino E, Bassano MA, et al. (2008) MRI activity and neutralising antibody as predictors of response to interferon beta treatment in multiple sclerosis. *J Neurol Neurosurg Psychiatr* 79: 646–651.
- Prosperini L, Gallo V, Petsas N, Borriello G, Pozzilli C (2009) One-year MRI scan predicts clinical response to interferon beta in multiple sclerosis. *Eur J Neurol* 16: 1202–1209.
- Panitch HS, Hirsch RL, Haley AS, Johnson KP (1987) Exacerbations of multiple sclerosis in patients treated with gamma interferon. *Lancet* 1: 893–895.
- Panitch HS, Hirsch RL, Schindler J, Johnson KP (1987) Treatment of multiple sclerosis with gamma interferon: Exacerbations associated with activation of the immune system. *Neurology* 37: 1097–1102.
- Banchereau J, Pascual V (2006) Type I interferon in systemic lupus erythematosus and other autoimmune diseases. *Immunity* 25(3): 383–392.
- van Baarsen LG, van der Pouw Kraan TC, Kragt JJ, Baggen JM, Rustenburg F, et al. (2006) A subtype of multiple sclerosis defined by an activated immune defense program. *Genes Immun* 7: 522–531.
- Axtell RC, de Jong BA, Boniface K, van der Voort LF, Bhat R, et al. (2010) T helper type 1 and 17 cells determine efficacy of interferon-beta in multiple sclerosis and experimental encephalomyelitis. *Nat Med* 16: 406–412.
- Marik C, Felts PA, Bauer J, Lassmann H, Smith KJ (2007) Lesion genesis in a subset of patients with multiple sclerosis: A role for innate immunity? *Brain* 130(Pt 11): 2800–2815.
- Bertolotto A, Gilli F (2008) Interferon-beta responders and non-responders. A biological approach. *Neurol Sci* 29 (Suppl 2): S216–7.
- Sbardella E, Tomassini V, Gasperini C, Bellomi F, Cefaro LA, et al. (2009) Neutralizing antibodies explain the poor clinical response to interferon beta in a small proportion of patients with multiple sclerosis: A retrospective study. *BMC Neurol* 9: 54.
- Sturzebecher S, Wandinger KP, Rosenwald A, Sathyamoorthy M, Tzou A, et al. (2003) Expression profiling identifies responder and non-responder phenotypes to interferon-beta in multiple sclerosis. *Brain* 126(Pt 6): 1419–1429.
- Wandinger KP, Sturzebecher CS, Bielekova B, Detore G, Rosenwald A, et al. (2001) Complex immunomodulatory effects of interferon-beta in multiple sclerosis include the upregulation of T helper 1-associated marker genes. *Ann Neurol* 50(3): 349–357.
- Kurtzke JF (1983) Rating neurologic impairment in multiple sclerosis: An expanded disability status scale (EDSS). *Neurology* 33: 1444–1452.
- Rudick RA, Cutter G, Reingold S (2002) The multiple sclerosis functional composite: A new clinical outcome measure for multiple sclerosis trials. *Mult Scler* 8: 359–365.
- Rudick RA, Cookfair DL, Simonian NA, Ransohoff RM, Richert JR, et al. (1999) Cerebrospinal fluid abnormalities in a phase III trial of avonex (IFN-beta-1a) for relapsing multiple sclerosis. The multiple sclerosis collaborative research group. *J Neuroimmunol* 93(2): 8–14.
- Cohen JA, Calabresi PA, Chakraborty S, Edwards KR, Eickenhorst T, et al. (2008) Avonex combination trial in relapsing-remitting MS: Rationale, design and baseline data. *Mult Scler* 14: 370–382.
- Rani MR, Xu Y, Lee JC, Shrock J, Josyula A, et al. (2009) Heterogeneous, longitudinally stable molecular signatures in response to interferon-beta. *Ann N Y Acad Sci* 1182: 58–68.
- Schlaak JF, Hilken CM, Costa-Pereira AP, Strobl B, Aberger F, et al. (2002) Cell-type and donor-specific transcriptional responses to interferon-alpha. Use of customized gene arrays. *J Biol Chem* 277: 49428–49437.
- Borden EC, Sen GC, Uze G, Silverman RH, Ransohoff RM, et al. (2007) Interferons at age 50: Past, current and future impact on biomedicine. *Nat Rev Drug Discov* 6: 975–990.
- Wandinger KP, Lunemann JD, Wengert O, Bellmann-Strobl J, Aktas O, et al. (2003) TNF-related apoptosis inducing ligand (TRAIL) as a potential response marker for interferon-beta treatment in multiple sclerosis. *Lancet* 361(9374): 2036–2043.
- Reeder AT, Velichko S, Yamaguchi KD, Hamamcioglu K, Ku K, et al. (2008) IFN-beta1b induces transient and variable gene expression in relapsing-remitting multiple sclerosis patients independent of neutralizing antibodies or changes in IFN receptor RNA expression. *J Interferon Cytokine Res* 28: 317–331.
- Kauffman MA, Yankilevich P, Barrero P, Bello R, Marangunich L, et al. (2009) Whole genome analysis of the action of interferon-beta. *Int J Clin Pharmacol Ther* 47: 328–357.
- Sturzebecher S, Maibauer R, Heuner A, Beckmann K, Aufdembrinke B (1999) Pharmacodynamic comparison of single doses of IFN-beta1a and IFN-beta1b in healthy volunteers. *J Interferon Cytokine Res* 19: 1257–1264.
- Kantor AB, Deng J, Waubant E, Lin H, Becker CH, et al. (2007) Identification of short-term pharmacodynamic effects of interferon-beta-1a in multiple sclerosis subjects with broad-based phenotypic profiling. *J Neuroimmunol* 188: 103–116.

30. Prynck AE, Yankilevich P, Barrero PR, Bello R, Marangunic L, et al. (2008) Two recombinant human interferon-beta 1a pharmaceutical preparations produce a similar transcriptional response determined using whole genome microarray analysis. *Int J Clin Pharmacol Ther* 46: 64–71.
31. Wenink MH, Santeogoets KC, Broen JC, van Bon L, Abdollahi-Roodsaz S, et al. (2009) TLR2 promotes Th2/Th17 responses via TLR4 and TLR7/8 by abrogating the type I IFN amplification loop. *J Immunol* 183: 6960–6970.
32. Naundorf S, Schroder M, Hoflich C, Suman N, Volk HD, et al. (2009) IL-10 interferes directly with TCR-induced IFN-gamma but not IL-17 production in memory T cells. *Eur J Immunol* 39: 1066–1077.
33. van Baarsen LG, Vosslander S, Tijssen M, Baggen JM, van der Voort LF, et al. (2008) Pharmacogenomics of interferon-beta therapy in multiple sclerosis: Baseline IFN signature determines pharmacological differences between patients. *PLoS ONE* 3: e1927.
34. Comabella M, Lunemann JD, Rio J, Sanchez A, Lopez C, et al. (2009) A type I interferon signature in monocytes is associated with poor response to interferon-beta in multiple sclerosis. *Brain* 132(Pt 12): 3353–3365.
35. De Jager PL, Jia X, Wang J, de Bakker PI, Ottoboni L, et al. (2009) Meta-analysis of genome scans and replication identify CD6, IRF8 and TNFRSF1A as new multiple sclerosis susceptibility loci. *Nat Genet* 41: 776–782.
36. Ban M, Goris A, Lorentzen AR, Baker A, Mihalova T, et al. (2009) Replication analysis identifies TYK2 as a multiple sclerosis susceptibility factor. *Eur J Hum Genet* 17: 1309–1313.
37. Sarasin-Filipowicz M, Oakeley EJ, Duong FH, Christen V, Terracciano L, et al. (2008) Interferon signaling and treatment outcome in chronic hepatitis C. *Proc Natl Acad Sci U S A* 105: 7034–7039.
38. Drulovic J, Savic E, Pekmezovic T, Mesaros S, Stojisavljevic N, et al. (2009) Expression of Th1 and Th17 cytokines and transcription factors in multiple sclerosis patients: Does baseline T-bet mRNA predict the response to interferon-beta treatment? *J Neuroimmunol* 215: 90–95.
39. Zhang X, Jin J, Tang Y, Speer D, Sujkowska D, et al. (2009) IFN-beta1a inhibits the secretion of Th17-polarizing cytokines in human dendritic cells via TLR7 up-regulation. *J Immunol* 182: 3928–3936.
40. Buttmann M, Merzyn C, Hofstetter HH, Rieckmann P (2007) TRAIL, CXCL10 and CCL2 plasma levels during long-term interferon-beta treatment of patients with multiple sclerosis correlate with flu-like adverse effects but do not predict therapeutic response. *J Neuroimmunol* 190: 170–176.
41. Malucchi S, Gilli F, Caldano M, Marnetto F, Valentino P, et al. (2008) Predictive markers for response to interferon therapy in patients with multiple sclerosis. *Neurology* 70(13 Pt 2): 1119–1127.
42. Wiesemann E, Deb M, Hemmer B, Radeke HH, Windhagen A (2008) Early identification of interferon-beta responders by ex vivo testing in patients with multiple sclerosis. *Clin Immunol* 128: 306–313.
43. Carrieri PB, Ladogana P, Di Spigna G, de Leva MF, Petracca M, et al. (2008) Interleukin-10 and interleukin-12 modulation in patients with relapsing-remitting multiple sclerosis on therapy with interferon-beta 1a: Differences in responders and non responders. *Immunopharmacol Immunotoxicol* 30: 1–9.
44. Gandhi KS, McKay FC, Schibeci SD, Arthur JW, Heard RN, et al. (2008) BAFF is a biological response marker to IFN-beta treatment in multiple sclerosis. *J Interferon Cytokine Res* 28: 529–539.
45. Goertsches RH, Hecker M, Zettl UK (2008) Monitoring of multiple sclerosis immunotherapy: From single candidates to biomarker networks. *J Neurol* 255 (Suppl 6): 48–57.
46. Garcia-Merino A, Barcenilla H, Diaz D, Monserrat J, Prieto A, et al. (2009) IFNbeta therapy progressively normalizes the increased ex vivo T lymphocyte apoptosis observed in active patients with multiple sclerosis. *Clin Immunol* 132: 195–202.
47. Sellebjerg F, Krakauer M, Hesse D, Ryder LP, Alsing I, et al. (2009) Identification of new sensitive biomarkers for the in vivo response to interferon-beta treatment in multiple sclerosis using DNA-array evaluation. *Eur J Neurol* 16: 1291–1298.
48. Marnetto F, Serra C, Astone V, Castellazzi M, Poddighe L, et al. (2008) Inhibition of multiple-sclerosis-associated retrovirus as biomarker of interferon therapy. *J Neurovirol* 14: 73–77.
49. Trapp BD, Peterson J, Ransohoff RM, Rudick R, Mork S, et al. (1998) Axonal transection in the lesions of multiple sclerosis. *N Engl J Med* 338: 278–285.
